# Supplementary material
Source: PubMed Central journal article supplement (PMC3696767)
Supplement: 1222571110_pnas.201222571SI.pdf [file 1222571110_pnas.201222571SI.pdf]

# Supporting Information

Cerling et al. 10.1073/pnas.1222571110

**Table S1. Stable isotope results ( $\delta^{13}\text{C}$  and  $\delta^{18}\text{O}$ ) for *Theropithecus* from Kenya**

| Sample           | Taxon             | Element     | Formation    | Member         | Region      | $\delta^{13}\text{C}$ | % $\text{C}_4$ | $\delta^{18}\text{O}$ |
|------------------|-------------------|-------------|--------------|----------------|-------------|-----------------------|----------------|-----------------------|
| KNM-OG 354       | <i>T. oswaldi</i> | m-frag      | Olorgesailie |                |             | 1.8                   | 100            | 2.8                   |
| KNM-ER 602 B     | <i>T. oswaldi</i> | rt M3       | Koobi Fora   | Okote          | Area 6      | 0.7                   | 90             | -1.8                  |
| KNM-ER 611       | <i>T. oswaldi</i> | rt m3       | Koobi Fora   | Okote          | Area 1      | 0.9                   | 95             | -1.0                  |
| KNM-ER 615       | <i>T. oswaldi</i> | rt M2 or M3 | Koobi Fora   | Upper Burgi    | Area 131    | -2.4                  | 70             | 1.1                   |
| KNM-ER 856       | <i>T. oswaldi</i> | rt M3       | Koobi Fora   | Okote          | Area 1      | 0.1                   | 90             | 2.1                   |
| KNM-OG 1243      | <i>T. oswaldi</i> | rt M3       | Olorgesailie |                |             | 1.7                   | 100            | 4.6                   |
| KNM-ER 1526 A    | <i>T. oswaldi</i> | rt m2       | Koobi Fora   | Upper Burgi    | Area 130    | -0.3                  | 85             | 1.1                   |
| KNM-ER 1531      | <i>T. oswaldi</i> | lt M3       | Koobi Fora   | KBS            | Area 123    | -0.8                  | 80             | 1.3                   |
| KNM-ER 1537      | <i>T. oswaldi</i> | lt M2       | Koobi Fora   | Upper Burgi    | Area 105    | 0.4                   | 90             | 1.4                   |
| KNM-ER 1566      | <i>T. brumpti</i> | lt p3       | Koobi Fora   | Tulu Bor       | Area 204    | -7.2                  | 35             | 1.4                   |
| KNM-OG 1825      | <i>T. oswaldi</i> | m-frag      | Olorgesailie |                |             | 1.5                   | 100            | 2.6                   |
| KNM-ER 2002      | <i>T. oswaldi</i> | rt p4       | Koobi Fora   | Upper Burgi    | Area 131    | -1.9                  | 75             | 0.5                   |
| KNM-ER 2015      | <i>T. brumpti</i> | rt p3       | Koobi Fora   | Tulu Bor       | Area 204    | -4.2                  | 60             | -1.6                  |
| KNM-ER 3013      | <i>T. brumpti</i> | lt m3       | Koobi Fora   | Tulu Bor       | Area 204    | -3.0                  | 65             | 0.8                   |
| KNM-ER 3022 F    | <i>T. brumpti</i> | m-frag      | Koobi Fora   | Tulu Bor       | Area 203    | -3.2                  | 65             | 0.4                   |
| KNM-ER 3025      | <i>T. darti</i>   | rt M3       | Koobi Fora   | Tulu Bor       | Area 117    | -2.5                  | 70             | -0.4                  |
| KNM-ER 3026      | <i>T. brumpti</i> | lt m1       | Koobi Fora   | Lokochot       | Area 117    | -2.3                  | 70             | -1.3                  |
| KNM-ER 3053      | <i>T. brumpti</i> | lt M2       | Koobi Fora   | Lokochot       | Area 117    | -3.6                  | 60             | -0.9                  |
| KNM-ER 3070      | <i>T. oswaldi</i> | lt M2       | Koobi Fora   | Upper Burgi    | Area 131    | -0.9                  | 80             | 0.7                   |
| KNM-ER 3115      | <i>T. brumpti</i> | lt p3       | Koobi Fora   | Lokochot       | Area 117    | -3.4                  | 65             | -2.6                  |
| KNM-ER 3775      | <i>T. brumpti</i> | rt M2       | Koobi Fora   | Lokochot       | Area 117    | -4.9                  | 55             | -2.3                  |
| KNM-ER 3775      | <i>T. brumpti</i> | rt M3       | Koobi Fora   | Lokochot       | Area 117    | -3.1                  | 65             | -1.4                  |
| KNM-ER 3780      | <i>T. brumpti</i> | lt p3       | Koobi Fora   | Lokochot       | Area 117    | -1.0                  | 80             | 0.0                   |
| KNM-ER 3814      | <i>T. oswaldi</i> | lt m3       | Koobi Fora   | Upper Burgi    | Area 115    | -2.5                  | 70             | 2.4                   |
| KNM-ER 3832      | <i>T. oswaldi</i> | lt M3       | Koobi Fora   | Upper Burgi    | Area 115    | -1.1                  | 80             | -0.4                  |
| KNM-ER 3872      | <i>T. oswaldi</i> | lt p4       | Koobi Fora   | Upper Burgi    | Area 131    | -0.9                  | 80             | -1.1                  |
| KNM-ER 4985      | <i>T. brumpti</i> | rt m3       | Koobi Fora   | Tulu Bor       | Area 203    | -5.7                  | 45             | 2.2                   |
| KNM-ER 5317      | <i>T. oswaldi</i> | lt m3       | Koobi Fora   | Upper Burgi    | Area 131    | 0.1                   | 90             | -2.3                  |
| KNM-ER 6007 A    | <i>T. oswaldi</i> | rt m3       | Koobi Fora   | Okote          | Area 3      | -0.3                  | 85             | 1.6                   |
| KNM-WT 16895     | <i>T. brumpti</i> | rt p3       | Nachukui     | Lower Lomekwi  |             | -1.6                  | 75             | -1.5                  |
| KNM-WT 17560     | <i>T. brumpti</i> | rt m3       | Nachukui     | Middle Lomekwi | LO9         | -2.4                  | 70             | -1.3                  |
| KNM-ER 20441     | <i>T. brumpti</i> | m-frag      | Koobi Fora   | Lonyumon       | Area 261-1A | -3.5                  | 65             | 0.0                   |
| KNM-ER 30384     | <i>T. brumpti</i> | lt m3       | Koobi Fora   | Lokochot       | Area 206    | -4.2                  | 55             | -2.1                  |
| KNM-ER 38567     | <i>T. oswaldi</i> | lt m3       | Koobi Fora   | KBS            | Area 123    | -3.0                  | 65             | 1.9                   |
| KNM-ER 38572     | <i>T. oswaldi</i> | lt m3       | Koobi Fora   | KBS            | Area 123    | -1.0                  | 80             | 0.0                   |
| KNM-ER 38573     | <i>T. oswaldi</i> | lt m2       | Koobi Fora   | KBS            | Area 123    | -0.7                  | 80             | 0.8                   |
| KNM-ER 38581     | <i>T. oswaldi</i> | lt M2       | Koobi Fora   | KBS            | Area 123    | -1.9                  | 75             | 1.6                   |
| KNM-ER 38583     | <i>T. oswaldi</i> | lt m3       | Koobi Fora   | KBS            | Area 123    | -2.7                  | 70             | 1.9                   |
| KNM-ER 40066     | <i>T. oswaldi</i> | lt p4       | Koobi Fora   | KBS            | Area 123    | -3.0                  | 65             | 2.7                   |
| KNM-ER 40068     | <i>T. oswaldi</i> | lt m2       | Koobi Fora   | KBS            | Area 123    | -0.8                  | 80             | 1.4                   |
| KNM-ER 40429     | <i>T. oswaldi</i> | lt m1       | Koobi Fora   | KBS/Okote      | Area 103    | -1.9                  | 75             | 0.8                   |
| KNM-ER 40431     | <i>T. oswaldi</i> | rt m3       | Koobi Fora   | Okote          | Area 8      | -1.2                  | 80             | 2.4                   |
| KNM-WT 52911     | <i>T. oswaldi</i> | rt m3       | Nachukui     | Nariokotome    |             | 2.4                   | 100            | -2.2                  |
| KNM-WT 53078     | <i>T. oswaldi</i> | rt M1       | Nachukui     | Nariokotome    |             | -0.6                  | 80             | -1.3                  |
| Field num F20206 | <i>T. oswaldi</i> | m2          | Koobi Fora   | Okote          | Area 40     | -1.0                  | 80             | 0.4                   |

The estimated percentage of  $\text{C}_4$  is based on the nominal end member values for  $\text{C}_3$  and  $\text{C}_4$  plants, and it is rounded to the nearest 5% to indicate the uncertainty in the true dietary estimate. Estimated ages (1) are Olorgesailie (1.0 Ma), Koobi Fora (Lonyumon: 4.0 Ma; Lokochot: 3.5 Ma; Tulu Bor: 3.2 Ma, U Burgi: 1.95 Ma; KBS: 1.8 Ma, Okote: 1.5 Ma), and Nachukui (Lower Lomekwi: 3.0 Ma; Middle Lomekwi: 3.0 Ma; Nariokotome: 1.2 Ma). KBS, Kay Behrensmeyer Site; lt, left; m-frag, molar fragment; rt, right.

1. McDougall I, et al. (2012) New single crystal  $^{40}\text{Ar}/^{39}\text{Ar}$  ages improve time scale for deposition of the Omo Group, Omo – Turkana Basin, East Africa. *J Geol Soc London* 169(2):213–226.

**Table S2.  $\delta^{13}\text{C}$  data from feces collected from two baboon groups over a ca. 3-wk period in the Amboseli region, Kenya**

| Identification | Sex | Date collected    | $\delta^{13}\text{C}$ | Age (y) | Group average   |
|----------------|-----|-------------------|-----------------------|---------|-----------------|
| Group 1.1      |     |                   |                       |         |                 |
| DRU            | F   | January 31, 2004  | -23.9                 | 2.2     |                 |
| SEB            | M   | February 8, 2004  | -23.2                 | 2.3     |                 |
| SEB            | M   | February 13, 2004 | -19.9                 | 2.3     | Preadult        |
| COO            | M   | February 8, 2004  | -24.8                 | 2.4     | Average         |
| COO            | M   | February 13, 2004 | -21.8                 | 2.4     | $-22.3 \pm 1.8$ |
| CRU            | M   | January 22, 2004  | -22.7                 | 3.5     | $n = 10$        |
| NAW            | M   | January 31, 2004  | -21.9                 | 6.4     |                 |
| FIG            | M   | January 31, 2004  | -19.0                 | 6.6     |                 |
| FIG            | M   | February 13, 2004 | -23.4                 | 6.6     |                 |
| HON            | F   | February 13, 2004 | -22.0                 | 6.8     |                 |
| FLA            | F   | February 13, 2004 | -23.9                 | 8.3     |                 |
| DUX            | F   | February 13, 2004 | -22.2                 | 8.4     | Adult           |
| COB            | F   | February 13, 2004 | -22.8                 | 8.7     | Average         |
| HOL            | F   | January 31, 2004  | -23.2                 | 10.1    | $-22.6 \pm 1.1$ |
| HOL            | F   | February 13, 2004 | -23.7                 | 10.1    | $n = 7$         |
| FAC            | F   | January 31, 2004  | -22.0                 | 11.1    |                 |
| DUD            | F   | January 31, 2004  | -20.7                 | 20.6    |                 |
| Group 1.2      |     |                   |                       |         |                 |
| RAN            | F   | January 24, 2004  | -25.2                 | 2.6     |                 |
| RAN            | F   | February 12, 2004 | -21.3                 | 2.6     | Preadult        |
| YAI            | F   | January 20, 2004  | -25.3                 | 3.3     | Average         |
| EVA            | F   | January 24, 2004  | -25.4                 | 3.6     | $-24.5 \pm 1.6$ |
| VEX            | F   | January 24, 2004  | -24.5                 | 5.4     | $n = 6$         |
| VIG            | F   | January 24, 2004  | -25.2                 | 5.6     |                 |
| VAP            | M   | January 24, 2004  | -25.1                 | 7.1     | Adult           |
| VAA            | F   | January 24, 2004  | -25.1                 | 9.0     | Average         |
| VOT            | F   | January 24, 2004  | -23.8                 | 9.3     | $-24.3 \pm 1.0$ |
| VET            | F   | January 24, 2004  | -23.2                 | 11.0    | $n = 4$         |

Different individuals are identified by a three-letter code; groups 1.1 and 1.2 are fully wild and part of the long-term behavior study of the Amboseli Baboon Research Project. Each group is subdivided into preadult [tooth enamel is in the formation and maturation stages (ages = 2–7 y)] and adult [tooth enamel is complete and all molars have erupted (age > 7 y)]; no infants (age < 2 y) are considered in this analysis.
